# Supplementary material for: Reproducibility and Robustness of Graph Measures of the Associative-Semantic Network
Source: PLoS One. 2014 Dec 12;9(12):e115215. doi: 10.1371/journal.pone.0115215 (PMC4264875; doi:10.1371/journal.pone.0115215)
Supplement: S1 Table — ICC values for each node for different graph measures at different densities and for the weighted network. (XLSX) [file pone.0115215.s004.xlsx]

## Sheet: ICC
SUPPLEMENTARY TABLE 1: ICC values for each node i for different graph measures
ICC VALUES		5% density
node	MNI coordinates	Ei	Li	bi	Eloc,i	Ci
R cerebellum	(12,-81,-36)	0.15	0.06	0.1	0.01	0.03
precuneus	(-3,-57,15)	0.14	0.12	0.09	0.17	0.15
L GFi pars triang.	(-51,21,24)	0.09	0	0.04	0.14	0.15
dorsomedial prefrontal	(-3,15,54)	0.17	0	0.13	-0.01	-0.01
L vOT	(-54,-57,-18)	0.21	-0.02	0.27	0.14	0.15
R cerebellum	(30,-69,-54)	0.31	0.11	0.19	0.13	0.14
L ant. GFi	(-39,39,-18)	0.16	-0.12	0.25	0.05	0.06
L GFI pars orbit.	(-54,27,-3)	0.16	0.05	0.15	-0.05	-0.04
L ant. fusiform	(-36,-42,-24)	0.05	-0.02	0.13	-0.05	-0.05
L lingual	(-15,-93,-9)	0.15	-0.05	0	0.12	0.1
L IFJ	(-39,6,33)	0.25	0.11	0.22	0.03	0.03
L post. GTM	(-63,-39,-6)	0.13	-0.05	0.13	0.05	0.04
L GFs	(-33,6,60)	0.13	0.13	0.12	0.02	0.01
L post. STS	(-60,-54,9)	0.2	0.09	0.14	0	0
L cerebellum	(-15,-54,-18)	0.19	0.07	0.12	0.05	0.03
L IPS	(-24,-66,39)	0.13	0.01	0.16	-0.04	-0.03
L SFS	(-24,24,54)	0.34	0.16	0.22	0.01	0.01
R cerebellum	(36,-69,-30)	0.22	0.04	0.19	0.03	0.03
L GFs	(-9,54,45)	0.23	-0.01	0.11	0.07	0.06
L insula	(-30,27,0)	0.02	-0.01	0.14	0.02	0.01
L GFs	(-9,36,60)	0.22	-0.02	0.24	0.14	0.14
L angular	(-48,-69,30)	0.18	0.18	0.11	-0.03	-0.02
R caudate	(12,3,12)	0.05	0.01	0.15	0.13	0.1
R inf. occip.	(27,-96,-3)	0.17	0.15	0.06	0.02	0.03
L SMA	(-9,3,72)	0.14	0.09	0.05	0	-0.01
R ant. fusiform	(33,-39,-24)	0.04	0.03	0	0	0
vermis	(6,-54,-42)	0.09	-0.03	0.08	0.03	0.03
L IPS	(-30,-66,60)	0.08	-0.02	0.09	0.09	0.1
R GFi pars orbit.	(42,24,-9)	0.06	0.06	0.12	0.04	0.04
precuneus	(-3,-63,45)	0.15	0.1	0.06	0.02	0.01
L parahippocampal	(-36,-18,-18)	0.14	0.07	0.23	-0.01	-0.01
brainstem	(0,-36,-33)	0.28	-0.03	0.16	0.07	0.06
L GOm	(-39,-87,0)	0.13	0.03	0.15	0.06	0.05
L ant. thalamus	(-12,-3,9)	0.08	-0.02	0.23	0.03	0.03
post. Thalamus	(-3,-33,3)	0.31	-0.02	0.17	-0.04	-0.04
g rectus	(-3,42,-24)	0.03	0.02	0.11	-0.03	-0.03
L hippocampus	(-30,-33,-6)	0.21	0.04	0.19	-0.03	-0.03
L ant. STS	(-57,-12,-9)	0.09	-0.02	0.12	0.01	0
R GFi pars triang.	(45,21,27)	0.25	0	0.25	0.08	0.08
L hippocampus	(-15,-6,-15)	0.39	0.2	0.25	-0.01	-0.01
L ant. cing. s.	(-9,30,33)	0.13	0.05	0.17	0.03	0.02
L medial frontal	(-9,63,18)	0.15	0.02	0.07	-0.06	-0.05
R cingulate sulcus	(9,21,39)	0.09	-0.11	0.11	-0.02	-0.02
L ant temp pole	(-33,6,-51)	0.24	0.19	0.1	0.07	0.05
brainstem	(3,-15,-12)	0.37	0.13	0.03	0.04	0.04
L cerebellum	(-21,-33,-51)	0.13	0.09	0.17	0.03	0.03
R inf. occip.	(42,-78,-9)	0.17	0.12	0.17	0.02	0.01
L cerebellum	(-30,-54,-39)	0.12	0.05	0.35	0.04	0.04
L orbitofrontal	(-15,60,-12)	0.27	0.02	0.34	0.04	0.04
L temporal pole	(-54,12,-21)	0.24	0.21	0.1	-0.04	-0.03
L precentral gyrus	(-33,-9,45)	0.09	-0.04	0.04	0.09	0.09
R GOm	(30,-93,18)	0.17	0.14	0.07	0.14	0.12
R cerebellum	(21,-39,-48)	0.23	0.16	0.16	0.09	0.1
L ant. Temporal	(-30,3,-30)	0.15	0.05	0.09	0.04	0.04
L caudate	(-15,21,12)	0.14	0.05	0.07	-0.03	-0.03
L supramarginal g.	(-60,-45,27)	0.13	0.05	0.13	0.04	0.01
L middle frontal g.	(-24,51,12)	0.14	0.05	0.16	-0.05	-0.05
ICC VALUES		7.8% density
node	MNI coordinates	Ei	Li	bi	Eloc,i	Ci
R cerebellum	(12,-81,-36)	0.15	0.12	0.15	0.02	0.02
precuneus	(-3,-57,15)	0.23	0.22	0.13	0.12	0.1
L GFi pars triang.	(-51,21,24)	0.08	0.04	0.14	0.03	0.02
dorsomedial prefrontal	(-3,15,54)	0.26	0.28	0.12	-0.01	-0.02
L vOT	(-54,-57,-18)	0.19	0.18	0.22	0.09	0.08
R cerebellum	(30,-69,-54)	0.2	-0.05	0.2	0.06	0.06
L ant. GFi	(-39,39,-18)	0.24	0.02	0.13	0.01	0.01
L GFI pars orbit.	(-54,27,-3)	0.14	0.1	0.07	0.01	-0.02
L ant. fusiform	(-36,-42,-24)	0.09	0.05	0.16	-0.07	-0.06
L lingual	(-15,-93,-9)	0.08	0.06	0.03	0.14	0.13
L IFJ	(-39,6,33)	0.19	0	0.12	0.06	0.04
L post. GTM	(-63,-39,-6)	0.2	0.12	0.2	0.01	0.02
L GFs	(-33,6,60)	0.18	0.16	0.14	0.06	0.04
L post. STS	(-60,-54,9)	0.19	0.13	0.13	-0.03	-0.03
L cerebellum	(-15,-54,-18)	0.13	-0.01	0.24	0.02	0.02
L IPS	(-24,-66,39)	0.14	0.06	0.15	0.02	0.05
L SFS	(-24,24,54)	0.2	0.04	0.27	-0.02	-0.02
R cerebellum	(36,-69,-30)	0.17	0.15	0.15	0.08	0.06
L GFs	(-9,54,45)	0.25	0.1	0.21	0	-0.01
L insula	(-30,27,0)	0.12	-0.01	0.11	-0.02	-0.02
L GFs	(-9,36,60)	0.25	0.18	0.26	0.12	0.06
L angular	(-48,-69,30)	0.15	0.16	0.11	0.08	0.02
R caudate	(12,3,12)	0.13	0.11	0.17	0.07	0.06
R inf. occip.	(27,-96,-3)	0.2	0.18	0.04	0.04	0.07
L SMA	(-9,3,72)	0.15	-0.03	0.03	-0.1	-0.1
R ant. fusiform	(33,-39,-24)	0.1	0.09	0.08	0.12	0.12
vermis	(6,-54,-42)	0.11	0.03	0.15	0.01	0.01
L IPS	(-30,-66,60)	0.11	0.1	0.12	0.04	0.03
R GFi pars orbit.	(42,24,-9)	0.1	0.11	0.1	0.02	0.02
precuneus	(-3,-63,45)	0.11	0.13	-0.03	-0.03	-0.05
L parahippocampal	(-36,-18,-18)	0.23	-0.04	0.18	-0.05	-0.05
brainstem	(0,-36,-33)	0.25	0.01	0.16	0.2	0.19
L GOm	(-39,-87,0)	0.13	0.1	0.14	0.05	0.06
L ant. thalamus	(-12,-3,9)	0.1	0.1	0.12	0	-0.02
post. Thalamus	(-3,-33,3)	0.3	-0.05	0.31	-0.03	-0.02
g rectus	(-3,42,-24)	0.2	0.16	0.18	-0.07	-0.05
L hippocampus	(-30,-33,-6)	0.23	0.08	0.24	0.01	0.02
L ant. STS	(-57,-12,-9)	0.07	0.09	0.18	0.04	0.04
R GFi pars triang.	(45,21,27)	0.18	-0.04	0.16	0	0
L hippocampus	(-15,-6,-15)	0.28	0.26	0.17	0.05	0.02
L ant. cing. s.	(-9,30,33)	0.09	-0.03	0.09	-0.05	-0.06
L medial frontal	(-9,63,18)	0.18	0.06	0.13	0.07	0.06
R cingulate sulcus	(9,21,39)	0.15	-0.04	0.05	0.08	0.06
L ant temp pole	(-33,6,-51)	0.16	-0.04	0.05	0.08	0.05
brainstem	(3,-15,-12)	0.16	0.05	0.08	0.04	0.05
L cerebellum	(-21,-33,-51)	0.17	0.13	0.17	0.06	0.05
R inf. occip.	(42,-78,-9)	0.17	0.01	0.13	0.16	0.17
L cerebellum	(-30,-54,-39)	0.15	0.09	0.23	0.11	0.08
L orbitofrontal	(-15,60,-12)	0.25	0.13	0.23	0.04	0.02
L temporal pole	(-54,12,-21)	0.13	0.09	0.11	-0.04	-0.05
L precentral gyrus	(-33,-9,45)	0.04	-0.09	0.05	0.06	0.06
R GOm	(30,-93,18)	0.24	0.16	0.25	0.15	0.13
R cerebellum	(21,-39,-48)	0.18	0.06	0.31	0.19	0.18
L ant. Temporal	(-30,3,-30)	0.11	0.04	0.06	0	0.01
L caudate	(-15,21,12)	0.13	-0.04	0.23	0.02	0.02
L supramarginal g.	(-60,-45,27)	0.15	0.13	0.12	0.15	0.16
L middle frontal g.	(-24,51,12)	0.05	-0.01	0.16	0.05	0.03
ICC VALUES		10% density
node	MNI coordinates	Ei	Li	bi	Eloc,i	Ci
R cerebellum	(12,-81,-36)	0.22	0.2	0.18	0	0.01
precuneus	(-3,-57,15)	0.16	0.15	0.11	0.07	0.07
L GFi pars triang.	(-51,21,24)	0.15	0.12	0.15	0.04	0.02
dorsomedial prefrontal	(-3,15,54)	0.22	0.24	0.08	0.06	0.06
L vOT	(-54,-57,-18)	0.21	0.2	0.23	0.03	0.02
R cerebellum	(30,-69,-54)	0.25	0.12	0.26	0.11	0.1
L ant. GFi	(-39,39,-18)	0.18	0.14	0.13	0	0.01
L GFI pars orbit.	(-54,27,-3)	0.14	0.12	0.06	0.07	0.05
L ant. fusiform	(-36,-42,-24)	0.06	0.08	0.09	0	0.03
L lingual	(-15,-93,-9)	0.04	0.05	0.07	0.07	0.04
L IFJ	(-39,6,33)	0.25	0.24	0.1	0.02	0
L post. GTM	(-63,-39,-6)	0.17	0.11	0.1	0.06	0.07
L GFs	(-33,6,60)	0.16	0.13	0.12	0.04	0.04
L post. STS	(-60,-54,9)	0.16	0.11	0.12	-0.01	-0.03
L cerebellum	(-15,-54,-18)	0.15	0.12	0.19	0	-0.01
L IPS	(-24,-66,39)	0.17	0.13	0.14	0.09	0.11
L SFS	(-24,24,54)	0.18	0.16	0.21	-0.04	-0.06
R cerebellum	(36,-69,-30)	0.22	0.21	0.15	0.02	0.03
L GFs	(-9,54,45)	0.24	0.17	0.17	0.03	-0.01
L insula	(-30,27,0)	0.06	0	0.22	0.08	0.09
L GFs	(-9,36,60)	0.22	0.16	0.24	0.13	0.06
L angular	(-48,-69,30)	0.14	0.15	0.12	0.14	0.15
R caudate	(12,3,12)	0.22	0.2	0.22	0.09	0.09
R inf. occip.	(27,-96,-3)	0.17	0.12	0.12	0.03	0.04
L SMA	(-9,3,72)	0.2	-0.05	0.09	-0.06	-0.03
R ant. fusiform	(33,-39,-24)	0.07	0.06	0.16	-0.02	-0.03
vermis	(6,-54,-42)	0.12	0.04	0.15	0.01	-0.03
L IPS	(-30,-66,60)	0.14	0.11	0.18	0.07	0.03
R GFi pars orbit.	(42,24,-9)	0.07	0.14	0.12	0.05	0.03
precuneus	(-3,-63,45)	0.17	0.17	0.07	0	-0.04
L parahippocampal	(-36,-18,-18)	0.24	-0.08	0.17	-0.03	-0.02
brainstem	(0,-36,-33)	0.26	0.17	0.23	0.1	0.06
L GOm	(-39,-87,0)	0.13	0.1	0.11	0.02	0.03
L ant. thalamus	(-12,-3,9)	0.08	0.04	0.13	0.08	0.04
post. Thalamus	(-3,-33,3)	0.22	0.18	0.19	0.02	0.02
g rectus	(-3,42,-24)	0.23	0.22	0.14	-0.15	-0.1
L hippocampus	(-30,-33,-6)	0.29	0.24	0.24	0	0.02
L ant. STS	(-57,-12,-9)	0.15	0.11	0.17	0	-0.02
R GFi pars triang.	(45,21,27)	0.2	0.02	0.13	0	-0.04
L hippocampus	(-15,-6,-15)	0.29	0.27	0.16	-0.01	-0.02
L ant. cing. s.	(-9,30,33)	0.06	0.07	0.07	0.03	0
L medial frontal	(-9,63,18)	0.15	0.11	0.07	0.04	0.03
R cingulate sulcus	(9,21,39)	0.19	0.16	0.03	-0.01	-0.03
L ant temp pole	(-33,6,-51)	0.11	0.02	0.1	-0.07	-0.07
brainstem	(3,-15,-12)	0.24	0.11	0.18	0.02	0
L cerebellum	(-21,-33,-51)	0.18	0.18	0.17	0.06	0.05
R inf. occip.	(42,-78,-9)	0.15	0.11	0.17	0.07	0.07
L cerebellum	(-30,-54,-39)	0.13	-0.02	0.16	0.13	0.1
L orbitofrontal	(-15,60,-12)	0.26	0.2	0.15	-0.03	-0.05
L temporal pole	(-54,12,-21)	0.25	0.23	0.18	-0.08	-0.08
L precentral gyrus	(-33,-9,45)	0.12	-0.03	0.04	0.02	-0.01
R GOm	(30,-93,18)	0.22	0.14	0.26	0.15	0.13
R cerebellum	(21,-39,-48)	0.18	0.16	0.28	0.06	0.06
L ant. Temporal	(-30,3,-30)	0.08	-0.04	0.11	0.06	0.08
L caudate	(-15,21,12)	0.18	0	0.2	-0.01	0
L supramarginal g.	(-60,-45,27)	0.19	0.17	0.13	0.08	0.1
L middle frontal g.	(-24,51,12)	0.08	-0.05	0.19	0	-0.01
ICC VALUES		15% density
node	MNI coordinates	Ei	Li	bi	Eloc,i	Ci
R cerebellum	(12,-81,-36)	0.17	0.16	0.07	0.03	0.08
precuneus	(-3,-57,15)	0.19	0.19	0.15	0.1	0.13
L GFi pars triang.	(-51,21,24)	0.14	0.14	0.12	0.03	0.05
dorsomedial prefrontal	(-3,15,54)	0.21	0.23	0.13	0.11	0.14
L vOT	(-54,-57,-18)	0.22	0.19	0.18	0.08	0.02
R cerebellum	(30,-69,-54)	0.25	0.22	0.16	0.03	0.02
L ant. GFi	(-39,39,-18)	0.23	0.21	0.22	0.08	0.07
L GFI pars orbit.	(-54,27,-3)	0.09	0.09	0.04	0.09	0.06
L ant. fusiform	(-36,-42,-24)	0.1	0.07	0.12	-0.01	0.02
L lingual	(-15,-93,-9)	0.1	0.09	0.09	0.11	0.08
L IFJ	(-39,6,33)	0.24	0.23	0.12	-0.05	-0.03
L post. GTM	(-63,-39,-6)	0.08	0.07	0.09	0.1	0.09
L GFs	(-33,6,60)	0.11	0.09	0.06	-0.01	-0.06
L post. STS	(-60,-54,9)	0.22	0.21	0.14	0.02	0.02
L cerebellum	(-15,-54,-18)	0.2	0.12	0.19	0.03	0.03
L IPS	(-24,-66,39)	0.2	0.18	0.19	0.05	0.01
L SFS	(-24,24,54)	0.15	0.11	0.2	0.01	-0.03
R cerebellum	(36,-69,-30)	0.18	0.18	0.13	-0.06	-0.01
L GFs	(-9,54,45)	0.2	0.18	0.18	0.1	0.09
L insula	(-30,27,0)	0.05	0.1	0.14	-0.12	-0.1
L GFs	(-9,36,60)	0.15	0.14	0.18	0.15	0.25
L angular	(-48,-69,30)	0.1	0.09	0.12	0.03	0
R caudate	(12,3,12)	0.26	0.22	0.28	0.06	0.08
R inf. occip.	(27,-96,-3)	0.09	0.07	0.14	0	-0.02
L SMA	(-9,3,72)	0.18	0.2	0.09	0.07	0.08
R ant. fusiform	(33,-39,-24)	0.1	0.09	0.09	-0.04	-0.04
vermis	(6,-54,-42)	0.08	0.04	0.05	0.01	-0.01
L IPS	(-30,-66,60)	0.21	0.21	0.18	0.07	0.1
R GFi pars orbit.	(42,24,-9)	0.11	0.1	0.07	0.02	-0.01
precuneus	(-3,-63,45)	0.21	0.21	0.15	0.02	0.07
L parahippocampal	(-36,-18,-18)	0.23	0.22	0.18	0.03	0.07
brainstem	(0,-36,-33)	0.22	0.2	0.25	0.08	0.1
L GOm	(-39,-87,0)	0.08	0.08	0.05	0	0.07
L ant. thalamus	(-12,-3,9)	0.13	0.1	0.09	-0.03	-0.02
post. Thalamus	(-3,-33,3)	0.26	0.27	0.17	0.1	0.09
g rectus	(-3,42,-24)	0.21	0.17	0.24	0.09	0.08
L hippocampus	(-30,-33,-6)	0.29	0.26	0.29	0.02	-0.01
L ant. STS	(-57,-12,-9)	0.14	0.14	0.11	0.06	0.06
R GFi pars triang.	(45,21,27)	0.11	0.04	0.05	-0.03	-0.08
L hippocampus	(-15,-6,-15)	0.26	0.26	0.15	0.08	0.03
L ant. cing. s.	(-9,30,33)	0.06	0.02	0.07	0.05	0.01
L medial frontal	(-9,63,18)	0.16	0.16	0.06	0.03	0.01
R cingulate sulcus	(9,21,39)	0.16	0.13	0.1	0.01	-0.03
L ant temp pole	(-33,6,-51)	0.15	0.15	0.1	-0.01	-0.02
brainstem	(3,-15,-12)	0.23	0.21	0.17	0.11	0.11
L cerebellum	(-21,-33,-51)	0.07	0.05	0.14	0.17	0.15
R inf. occip.	(42,-78,-9)	0.08	0.07	0.06	0.06	0.07
L cerebellum	(-30,-54,-39)	0.1	0.09	0.05	0.09	0.05
L orbitofrontal	(-15,60,-12)	0.3	0.29	0.28	-0.01	-0.03
L temporal pole	(-54,12,-21)	0.19	0.17	0.15	0.05	0
L precentral gyrus	(-33,-9,45)	0.09	0.01	0.04	0	-0.02
R GOm	(30,-93,18)	0.28	0.21	0.33	0.08	0.09
R cerebellum	(21,-39,-48)	0.21	0.18	0.24	0.08	0.18
L ant. Temporal	(-30,3,-30)	0.08	0.03	0.07	0.03	-0.01
L caudate	(-15,21,12)	0.18	0.14	0.18	0.03	0.01
L supramarginal g.	(-60,-45,27)	0.19	0.17	0.18	0.01	0.05
L middle frontal g.	(-24,51,12)	0.1	0.08	0.07	-0.07	-0.07
ICC VALUES		20% density
node	MNI coordinates	Ei	Li	bi	Eloc,i	Ci
R cerebellum	(12,-81,-36)	0.16	0.15	0.15	0.07	0.07
precuneus	(-3,-57,15)	0.19	0.15	0.16	0.07	0.08
L GFi pars triang.	(-51,21,24)	0.11	0.12	0.13	0.05	0.01
dorsomedial prefrontal	(-3,15,54)	0.17	0.17	0.18	0.08	0.08
L vOT	(-54,-57,-18)	0.22	0.19	0.22	0.1	0
R cerebellum	(30,-69,-54)	0.2	0.16	0.17	0.1	-0.01
L ant. GFi	(-39,39,-18)	0.27	0.24	0.26	0.06	0
L GFI pars orbit.	(-54,27,-3)	0.07	0.06	0.05	0.02	0.12
L ant. fusiform	(-36,-42,-24)	0.14	0.11	0.2	0.03	0.04
L lingual	(-15,-93,-9)	0.08	0.06	0.03	0.16	0.11
L IFJ	(-39,6,33)	0.22	0.25	0.11	0.12	0.1
L post. GTM	(-63,-39,-6)	0.15	0.15	0.15	0	0.01
L GFs	(-33,6,60)	0.1	0.1	0.06	0.06	0.08
L post. STS	(-60,-54,9)	0.15	0.12	0.17	0.06	0.11
L cerebellum	(-15,-54,-18)	0.15	0.14	0.19	0.06	0.09
L IPS	(-24,-66,39)	0.23	0.21	0.22	-0.07	-0.07
L SFS	(-24,24,54)	0.12	0.09	0.12	0.12	0.1
R cerebellum	(36,-69,-30)	0.17	0.18	0.17	-0.06	-0.02
L GFs	(-9,54,45)	0.21	0.21	0.12	0.15	0.11
L insula	(-30,27,0)	0.08	0.07	0.1	-0.05	0.04
L GFs	(-9,36,60)	0.11	0.08	0.15	0.13	0.19
L angular	(-48,-69,30)	0.11	0.08	0.17	0.08	0.04
R caudate	(12,3,12)	0.16	0.12	0.15	0.06	0.02
R inf. occip.	(27,-96,-3)	0.08	0.05	0.13	0.02	0.03
L SMA	(-9,3,72)	0.15	0.18	0.1	0.11	0.11
R ant. fusiform	(33,-39,-24)	0.06	0.04	0.07	0	-0.05
vermis	(6,-54,-42)	0.1	0.08	0.09	0.04	0.04
L IPS	(-30,-66,60)	0.19	0.25	0.13	0.04	0.1
R GFi pars orbit.	(42,24,-9)	0.14	0.14	0.13	0.13	0.06
precuneus	(-3,-63,45)	0.22	0.22	0.15	0.04	0.03
L parahippocampal	(-36,-18,-18)	0.31	0.32	0.22	-0.1	-0.01
brainstem	(0,-36,-33)	0.22	0.18	0.22	0.06	0.02
L GOm	(-39,-87,0)	0.04	0.04	0.03	0.02	0.1
L ant. thalamus	(-12,-3,9)	0.08	0.05	0.09	0.05	0.15
post. Thalamus	(-3,-33,3)	0.22	0.23	0.13	0.07	0
g rectus	(-3,42,-24)	0.26	0.25	0.18	0.16	0
L hippocampus	(-30,-33,-6)	0.3	0.28	0.22	-0.08	-0.12
L ant. STS	(-57,-12,-9)	0.11	0.1	0.03	0.06	-0.04
R GFi pars triang.	(45,21,27)	0.13	0.1	0.11	0.04	-0.04
L hippocampus	(-15,-6,-15)	0.24	0.23	0.1	0.11	0.07
L ant. cing. s.	(-9,30,33)	0.08	0.06	0.12	0.03	0.05
L medial frontal	(-9,63,18)	0.1	0.12	0.02	0.12	0.09
R cingulate sulcus	(9,21,39)	0.13	0.12	0.08	0.1	-0.04
L ant temp pole	(-33,6,-51)	0.11	0.1	0.12	-0.03	0
brainstem	(3,-15,-12)	0.2	0.18	0.17	0.13	0.05
L cerebellum	(-21,-33,-51)	0.19	0.18	0.16	0.04	0.05
R inf. occip.	(42,-78,-9)	0.14	0.09	0.14	0.15	0.12
L cerebellum	(-30,-54,-39)	0.01	-0.01	0.02	-0.01	-0.02
L orbitofrontal	(-15,60,-12)	0.25	0.22	0.26	0.08	0.14
L temporal pole	(-54,12,-21)	0.16	0.13	0.16	0	-0.06
L precentral gyrus	(-33,-9,45)	0.14	0.14	0.13	0.07	0.08
R GOm	(30,-93,18)	0.22	0.16	0.24	-0.01	-0.03
R cerebellum	(21,-39,-48)	0.23	0.25	0.18	0.02	0.06
L ant. Temporal	(-30,3,-30)	0.13	0.04	0.02	0.04	-0.04
L caudate	(-15,21,12)	0.13	0.09	0.16	0.01	0
L supramarginal g.	(-60,-45,27)	0.19	0.16	0.19	0.01	0.06
L middle frontal g.	(-24,51,12)	0.19	0.21	0.1	0.01	0.02
ICC VALUES		25% density
node	MNI coordinates	Ei	Li	bi	Eloc,i	Ci
R cerebellum	(12,-81,-36)	0.18	0.17	0.18	0.03	0.07
precuneus	(-3,-57,15)	0.24	0.24	0.21	0.05	0.09
L GFi pars triang.	(-51,21,24)	0.08	0.09	0.15	0.06	0.01
dorsomedial prefrontal	(-3,15,54)	0.11	0.11	0.1	0.02	0.03
L vOT	(-54,-57,-18)	0.28	0.26	0.27	0.04	-0.04
R cerebellum	(30,-69,-54)	0.16	0.15	0.13	0.1	-0.02
L ant. GFi	(-39,39,-18)	0.28	0.25	0.31	0.09	0.04
L GFI pars orbit.	(-54,27,-3)	0.09	0.08	0.09	0.1	0.11
L ant. fusiform	(-36,-42,-24)	0.11	0.1	0.14	-0.08	-0.1
L lingual	(-15,-93,-9)	0.05	0.04	0.07	0.08	0.13
L IFJ	(-39,6,33)	0.2	0.21	0.13	0.1	0.09
L post. GTM	(-63,-39,-6)	0.11	0.1	0.12	0.01	0.05
L GFs	(-33,6,60)	-0.05	-0.04	-0.05	0.06	0.05
L post. STS	(-60,-54,9)	0.17	0.16	0.18	0.01	0.08
L cerebellum	(-15,-54,-18)	0.14	0.11	0.13	0.08	0.08
L IPS	(-24,-66,39)	0.23	0.21	0.27	-0.01	-0.03
L SFS	(-24,24,54)	0.14	0.14	0.14	0.01	0.01
R cerebellum	(36,-69,-30)	0.16	0.17	0.21	-0.05	-0.06
L GFs	(-9,54,45)	0.14	0.13	0.05	0.12	0.01
L insula	(-30,27,0)	0.11	0.1	0.12	-0.03	0
L GFs	(-9,36,60)	0.13	0.14	0.13	0.12	0.14
L angular	(-48,-69,30)	0.1	0.1	0.17	-0.04	0.02
R caudate	(12,3,12)	0.07	0.03	0.1	0.01	0
R inf. occip.	(27,-96,-3)	0.1	0.06	0.13	0.09	0.16
L SMA	(-9,3,72)	0.13	0.16	0.09	0.08	-0.04
R ant. fusiform	(33,-39,-24)	0.08	0.05	0.11	0.04	-0.02
vermis	(6,-54,-42)	0.17	0.17	0.13	0.07	0.07
L IPS	(-30,-66,60)	0.21	0.24	0.2	0.01	0.09
R GFi pars orbit.	(42,24,-9)	0.22	0.2	0.22	0.06	0.04
precuneus	(-3,-63,45)	0.22	0.21	0.19	-0.05	-0.02
L parahippocampal	(-36,-18,-18)	0.29	0.31	0.22	-0.03	0.02
brainstem	(0,-36,-33)	0.16	0.14	0.18	0.09	0.05
L GOm	(-39,-87,0)	0	0.02	-0.05	-0.05	0.03
L ant. thalamus	(-12,-3,9)	0.1	0.09	0.09	0.07	0.12
post. Thalamus	(-3,-33,3)	0.24	0.24	0.19	0.04	0.04
g rectus	(-3,42,-24)	0.17	0.15	0.13	-0.01	-0.04
L hippocampus	(-30,-33,-6)	0.24	0.21	0.22	-0.08	-0.14
L ant. STS	(-57,-12,-9)	0.15	0.13	0.06	0.05	-0.03
R GFi pars triang.	(45,21,27)	0.13	0.12	0.14	0.03	0.13
L hippocampus	(-15,-6,-15)	0.23	0.22	0.13	0.15	0.07
L ant. cing. s.	(-9,30,33)	0.01	0.02	0.04	-0.03	0.03
L medial frontal	(-9,63,18)	0.13	0.12	0.07	0.06	0.05
R cingulate sulcus	(9,21,39)	0.11	0.08	0.11	0.07	-0.04
L ant temp pole	(-33,6,-51)	0.09	0.11	0.04	-0.02	-0.02
brainstem	(3,-15,-12)	0.19	0.18	0.13	0.09	0.01
L cerebellum	(-21,-33,-51)	0.19	0.18	0.14	0.04	0.01
R inf. occip.	(42,-78,-9)	0.18	0.15	0.19	0.09	0.11
L cerebellum	(-30,-54,-39)	0.03	0	0.02	-0.04	-0.05
L orbitofrontal	(-15,60,-12)	0.28	0.27	0.24	0.04	0.04
L temporal pole	(-54,12,-21)	0.12	0.07	0.16	0.04	0.02
L precentral gyrus	(-33,-9,45)	0.07	0.08	0.05	-0.03	0.06
R GOm	(30,-93,18)	0.21	0.21	0.16	-0.06	-0.04
R cerebellum	(21,-39,-48)	0.2	0.22	0.15	-0.02	0.09
L ant. Temporal	(-30,3,-30)	0.14	0.16	0.04	-0.01	-0.05
L caudate	(-15,21,12)	0.1	0.07	0.07	0.06	0.03
L supramarginal g.	(-60,-45,27)	0.18	0.15	0.15	0.02	-0.02
L middle frontal g.	(-24,51,12)	0.15	0.16	0.11	0.03	0.01
ICC VALUES		30% density
node	MNI coordinates	Ei	Li	bi	Eloc,i	Ci
R cerebellum	(12,-81,-36)	0.16	0.17	0.12	-0.01	0.01
precuneus	(-3,-57,15)	0.22	0.22	0.18	-0.04	0
L GFi pars triang.	(-51,21,24)	0.14	0.14	0.16	0.17	0.07
dorsomedial prefrontal	(-3,15,54)	0.11	0.11	0.11	0.03	-0.01
L vOT	(-54,-57,-18)	0.26	0.26	0.26	-0.05	-0.05
R cerebellum	(30,-69,-54)	0.13	0.14	0.09	0.06	0.02
L ant. GFi	(-39,39,-18)	0.33	0.33	0.29	0.05	-0.02
L GFI pars orbit.	(-54,27,-3)	0.18	0.17	0.18	0.04	0.09
L ant. fusiform	(-36,-42,-24)	0.13	0.14	0.12	-0.06	-0.03
L lingual	(-15,-93,-9)	0.03	0.02	-0.02	0.12	0.15
L IFJ	(-39,6,33)	0.13	0.13	0.13	0.04	0.1
L post. GTM	(-63,-39,-6)	0.14	0.14	0.19	0.06	0.12
L GFs	(-33,6,60)	-0.02	-0.02	-0.06	0.07	0.03
L post. STS	(-60,-54,9)	0.15	0.15	0.14	0.04	0.06
L cerebellum	(-15,-54,-18)	0.08	0.08	0.06	0.1	0.02
L IPS	(-24,-66,39)	0.29	0.28	0.3	-0.02	-0.02
L SFS	(-24,24,54)	0.1	0.1	0.07	0.02	0.05
R cerebellum	(36,-69,-30)	0.17	0.16	0.16	-0.03	0
L GFs	(-9,54,45)	0.13	0.14	0.04	0.03	-0.02
L insula	(-30,27,0)	0.04	0.06	0.06	0.05	0.11
L GFs	(-9,36,60)	0.13	0.13	0.16	-0.05	0.06
L angular	(-48,-69,30)	0.05	0.05	0.11	-0.03	0
R caudate	(12,3,12)	0.03	0.02	0.01	0.02	0.02
R inf. occip.	(27,-96,-3)	0.14	0.14	0.13	0.04	0.07
L SMA	(-9,3,72)	0.14	0.16	0.12	0.09	0
R ant. fusiform	(33,-39,-24)	0.06	0.05	0.07	-0.02	-0.01
vermis	(6,-54,-42)	0.1	0.11	0.06	-0.06	-0.04
L IPS	(-30,-66,60)	0.17	0.18	0.17	0.04	0.09
R GFi pars orbit.	(42,24,-9)	0.14	0.13	0.11	0.09	0.06
precuneus	(-3,-63,45)	0.23	0.23	0.17	-0.01	-0.04
L parahippocampal	(-36,-18,-18)	0.3	0.3	0.23	0.01	0
brainstem	(0,-36,-33)	0.2	0.19	0.23	0.03	0.01
L GOm	(-39,-87,0)	-0.01	-0.01	-0.04	0	0.12
L ant. thalamus	(-12,-3,9)	0.09	0.1	0.1	0.19	0.16
post. Thalamus	(-3,-33,3)	0.21	0.22	0.17	0.01	0.06
g rectus	(-3,42,-24)	0.24	0.24	0.17	-0.01	0.01
L hippocampus	(-30,-33,-6)	0.22	0.21	0.18	0.05	0.01
L ant. STS	(-57,-12,-9)	0.14	0.13	0.07	0.02	-0.04
R GFi pars triang.	(45,21,27)	0.12	0.11	0.1	0.04	0.08
L hippocampus	(-15,-6,-15)	0.14	0.15	0.05	0.05	0.06
L ant. cing. s.	(-9,30,33)	-0.08	-0.07	-0.08	-0.02	0.04
L medial frontal	(-9,63,18)	0.1	0.09	0.07	0.05	-0.02
R cingulate sulcus	(9,21,39)	0.14	0.12	0.15	0.04	-0.01
L ant temp pole	(-33,6,-51)	0.06	0.07	0.03	-0.06	-0.06
brainstem	(3,-15,-12)	0.23	0.23	0.19	0.15	0.1
L cerebellum	(-21,-33,-51)	0.17	0.15	0.13	0.14	0.08
R inf. occip.	(42,-78,-9)	0.2	0.19	0.21	-0.03	-0.02
L cerebellum	(-30,-54,-39)	0.1	0.09	0.08	0.01	-0.02
L orbitofrontal	(-15,60,-12)	0.27	0.27	0.21	0.04	0.06
L temporal pole	(-54,12,-21)	0.14	0.13	0.12	0.06	0.05
L precentral gyrus	(-33,-9,45)	0.08	0.12	0.03	-0.06	0.06
R GOm	(30,-93,18)	0.21	0.2	0.17	-0.03	-0.03
R cerebellum	(21,-39,-48)	0.15	0.15	0.13	-0.09	-0.04
L ant. Temporal	(-30,3,-30)	0.09	0.1	0.03	-0.02	-0.04
L caudate	(-15,21,12)	0.11	0.09	0.07	0.01	-0.01
L supramarginal g.	(-60,-45,27)	0.24	0.23	0.26	-0.03	-0.04
L middle frontal g.	(-24,51,12)	0.1	0.12	0.12	0.03	0.09
ICC VALUES		35% density
node	MNI coordinates	Ei	Li	bi	Eloc,i	Ci
R cerebellum	(12,-81,-36)	0.15	0.15	0.1	-0.01	-0.03
precuneus	(-3,-57,15)	0.22	0.22	0.22	0.04	0.06
L GFi pars triang.	(-51,21,24)	0.14	0.14	0.17	0.1	0.04
dorsomedial prefrontal	(-3,15,54)	0.11	0.11	0.11	-0.03	-0.04
L vOT	(-54,-57,-18)	0.21	0.22	0.18	-0.09	-0.09
R cerebellum	(30,-69,-54)	0.13	0.13	0.1	0.04	0.02
L ant. GFi	(-39,39,-18)	0.28	0.28	0.23	-0.01	-0.02
L GFI pars orbit.	(-54,27,-3)	0.12	0.11	0.12	-0.01	0.03
L ant. fusiform	(-36,-42,-24)	0.08	0.08	0.04	0.01	-0.02
L lingual	(-15,-93,-9)	0.04	0.04	-0.02	0.05	0.05
L IFJ	(-39,6,33)	0.14	0.13	0.12	-0.01	0.03
L post. GTM	(-63,-39,-6)	0.09	0.09	0.12	0.04	0.05
L GFs	(-33,6,60)	-0.02	-0.02	-0.05	0.02	0.01
L post. STS	(-60,-54,9)	0.16	0.16	0.13	0.1	0.12
L cerebellum	(-15,-54,-18)	0.04	0.04	0.04	0.03	0.02
L IPS	(-24,-66,39)	0.23	0.23	0.26	0	0.05
L SFS	(-24,24,54)	0.12	0.12	0.07	-0.06	-0.07
R cerebellum	(36,-69,-30)	0.17	0.16	0.13	0.01	0.05
L GFs	(-9,54,45)	0.1	0.1	0.03	0.02	-0.01
L insula	(-30,27,0)	0.05	0.06	0.08	0.1	0.13
L GFs	(-9,36,60)	0.11	0.11	0.13	0.04	0.09
L angular	(-48,-69,30)	0.03	0.03	0.07	-0.01	-0.01
R caudate	(12,3,12)	0.02	0.02	0.01	-0.06	-0.05
R inf. occip.	(27,-96,-3)	0.14	0.14	0.15	0.12	0.11
L SMA	(-9,3,72)	0.07	0.07	0.04	0.03	0.01
R ant. fusiform	(33,-39,-24)	0.02	0.02	0.01	0.02	0.01
vermis	(6,-54,-42)	0.08	0.09	0.04	-0.03	-0.04
L IPS	(-30,-66,60)	0.15	0.15	0.14	-0.03	-0.01
R GFi pars orbit.	(42,24,-9)	0.09	0.09	0.08	0.03	0.03
precuneus	(-3,-63,45)	0.22	0.22	0.15	-0.06	-0.07
L parahippocampal	(-36,-18,-18)	0.23	0.23	0.19	0.04	0.06
brainstem	(0,-36,-33)	0.12	0.12	0.13	0.03	0.01
L GOm	(-39,-87,0)	0.01	0.01	0	-0.03	-0.01
L ant. thalamus	(-12,-3,9)	0.06	0.06	0.05	0.02	0.01
post. Thalamus	(-3,-33,3)	0.18	0.18	0.15	0	0.01
g rectus	(-3,42,-24)	0.21	0.21	0.15	0.01	0
L hippocampus	(-30,-33,-6)	0.18	0.18	0.16	-0.03	-0.02
L ant. STS	(-57,-12,-9)	0.07	0.07	0.04	-0.02	0
R GFi pars triang.	(45,21,27)	0.14	0.14	0.11	0.01	-0.01
L hippocampus	(-15,-6,-15)	0.17	0.17	0.09	0.08	0.08
L ant. cing. s.	(-9,30,33)	-0.02	-0.02	-0.05	0.02	0.03
L medial frontal	(-9,63,18)	0.09	0.1	0.06	0.08	0.05
R cingulate sulcus	(9,21,39)	0.16	0.16	0.16	-0.04	-0.04
L ant temp pole	(-33,6,-51)	0.04	0.04	0.04	-0.06	0
brainstem	(3,-15,-12)	0.18	0.18	0.14	0.15	0.09
L cerebellum	(-21,-33,-51)	0.17	0.16	0.14	0.09	0.08
R inf. occip.	(42,-78,-9)	0.13	0.13	0.12	0.04	0.03
L cerebellum	(-30,-54,-39)	0.07	0.07	0.07	-0.05	-0.08
L orbitofrontal	(-15,60,-12)	0.29	0.3	0.25	0.08	0.08
L temporal pole	(-54,12,-21)	0.08	0.08	0.05	-0.02	-0.01
L precentral gyrus	(-33,-9,45)	0.01	0.03	-0.01	0.01	0.05
R GOm	(30,-93,18)	0.16	0.16	0.14	-0.04	-0.03
R cerebellum	(21,-39,-48)	0.18	0.18	0.15	-0.15	-0.08
L ant. Temporal	(-30,3,-30)	0.08	0.09	0.02	-0.02	-0.02
L caudate	(-15,21,12)	0.05	0.05	0.03	0	-0.01
L supramarginal g.	(-60,-45,27)	0.16	0.16	0.16	-0.02	0
L middle frontal g.	(-24,51,12)	0.11	0.11	0.14	-0.01	0.07
ICC VALUES		40% density
node	MNI coordinates	Ei	Li	bi	Eloc,i	Ci
R cerebellum	(12,-81,-36)	0.15	0.15	0.09	0.04	0.02
precuneus	(-3,-57,15)	0.19	0.19	0.21	0.03	0.06
L GFi pars triang.	(-51,21,24)	0.11	0.11	0.12	0.03	0.01
dorsomedial prefrontal	(-3,15,54)	0.08	0.08	0.04	-0.08	-0.08
L vOT	(-54,-57,-18)	0.22	0.22	0.19	-0.04	-0.05
R cerebellum	(30,-69,-54)	0.11	0.11	0.09	-0.01	-0.01
L ant. GFi	(-39,39,-18)	0.23	0.23	0.19	-0.02	-0.01
L GFI pars orbit.	(-54,27,-3)	0.12	0.12	0.12	0.04	0.05
L ant. fusiform	(-36,-42,-24)	0.07	0.07	0.02	-0.08	-0.1
L lingual	(-15,-93,-9)	0	0	-0.02	0.08	0.09
L IFJ	(-39,6,33)	0.11	0.11	0.08	0.02	0.02
L post. GTM	(-63,-39,-6)	0.05	0.05	0.08	0.07	0.07
L GFs	(-33,6,60)	-0.02	-0.02	-0.08	-0.01	-0.03
L post. STS	(-60,-54,9)	0.12	0.12	0.07	0.04	0.03
L cerebellum	(-15,-54,-18)	0.04	0.04	0.03	0.05	0.04
L IPS	(-24,-66,39)	0.2	0.2	0.2	-0.03	-0.01
L SFS	(-24,24,54)	0.12	0.12	0.12	-0.03	-0.03
R cerebellum	(36,-69,-30)	0.14	0.14	0.13	0.05	0.05
L GFs	(-9,54,45)	0.11	0.12	0.08	-0.07	-0.06
L insula	(-30,27,0)	0.03	0.03	0.08	0.03	0.04
L GFs	(-9,36,60)	0.04	0.04	0.08	0.07	0.09
L angular	(-48,-69,30)	0.08	0.08	0.11	-0.01	0
R caudate	(12,3,12)	0.07	0.07	0.07	-0.08	-0.07
R inf. occip.	(27,-96,-3)	0.12	0.12	0.09	0.09	0.1
L SMA	(-9,3,72)	0.02	0.03	0.02	0.05	0.04
R ant. fusiform	(33,-39,-24)	0.03	0.03	0.04	-0.02	0
vermis	(6,-54,-42)	0.08	0.08	0.05	0.01	0.04
L IPS	(-30,-66,60)	0.12	0.12	0.11	-0.07	-0.06
R GFi pars orbit.	(42,24,-9)	0.1	0.1	0.09	0	0.01
precuneus	(-3,-63,45)	0.24	0.24	0.2	-0.01	-0.01
L parahippocampal	(-36,-18,-18)	0.22	0.22	0.2	0.01	0.05
brainstem	(0,-36,-33)	0.08	0.08	0.1	0	-0.02
L GOm	(-39,-87,0)	0.01	0.01	0	-0.12	-0.1
L ant. thalamus	(-12,-3,9)	0.02	0.02	0.01	0.02	0.05
post. Thalamus	(-3,-33,3)	0.12	0.12	0.09	0.05	0.06
g rectus	(-3,42,-24)	0.23	0.23	0.18	0.02	0.02
L hippocampus	(-30,-33,-6)	0.14	0.14	0.1	-0.03	-0.03
L ant. STS	(-57,-12,-9)	0.08	0.08	0.07	-0.05	-0.03
R GFi pars triang.	(45,21,27)	0.16	0.16	0.12	-0.05	-0.07
L hippocampus	(-15,-6,-15)	0.21	0.22	0.17	0.11	0.1
L ant. cing. s.	(-9,30,33)	-0.01	-0.02	-0.04	0.02	0.02
L medial frontal	(-9,63,18)	0.07	0.07	0.03	0	-0.01
R cingulate sulcus	(9,21,39)	0.13	0.13	0.14	-0.06	-0.05
L ant temp pole	(-33,6,-51)	0.06	0.06	0.08	0.08	0.11
brainstem	(3,-15,-12)	0.14	0.14	0.1	0.01	-0.02
L cerebellum	(-21,-33,-51)	0.14	0.13	0.15	0.08	0.07
R inf. occip.	(42,-78,-9)	0.12	0.12	0.12	0	-0.01
L cerebellum	(-30,-54,-39)	0.1	0.1	0.1	-0.08	-0.05
L orbitofrontal	(-15,60,-12)	0.28	0.28	0.26	0.05	0.06
L temporal pole	(-54,12,-21)	0.13	0.14	0.09	0.05	0.04
L precentral gyrus	(-33,-9,45)	0	0	-0.01	-0.02	0.02
R GOm	(30,-93,18)	0.11	0.11	0.09	-0.01	-0.01
R cerebellum	(21,-39,-48)	0.22	0.22	0.2	-0.08	-0.06
L ant. Temporal	(-30,3,-30)	0.08	0.08	0.04	0.03	0.02
L caudate	(-15,21,12)	0.05	0.05	0.05	-0.07	-0.04
L supramarginal g.	(-60,-45,27)	0.16	0.16	0.15	0.04	0.04
L middle frontal g.	(-24,51,12)	0.04	0.04	0.04	0.1	0.16
ICC VALUES		45% density
node	MNI coordinates	Ei	Li	bi	Eloc,i	Ci
R cerebellum	(12,-81,-36)	0.14	0.14	0.11	0.02	0.02
precuneus	(-3,-57,15)	0.17	0.17	0.18	0.03	0.04
L GFi pars triang.	(-51,21,24)	0.07	0.07	0.09	0.03	0.02
dorsomedial prefrontal	(-3,15,54)	0.12	0.12	0.06	-0.03	-0.04
L vOT	(-54,-57,-18)	0.21	0.21	0.22	0.01	0.02
R cerebellum	(30,-69,-54)	0.05	0.05	0.02	0.04	0.04
L ant. GFi	(-39,39,-18)	0.23	0.23	0.18	-0.05	-0.05
L GFI pars orbit.	(-54,27,-3)	0.1	0.1	0.09	0.03	0.03
L ant. fusiform	(-36,-42,-24)	0.03	0.03	0.02	-0.07	-0.07
L lingual	(-15,-93,-9)	-0.01	-0.01	-0.02	0.11	0.12
L IFJ	(-39,6,33)	0.09	0.09	0.04	-0.01	-0.01
L post. GTM	(-63,-39,-6)	0.04	0.04	0.04	0.05	0.05
L GFs	(-33,6,60)	-0.03	-0.03	-0.04	0.03	0.03
L post. STS	(-60,-54,9)	0.1	0.1	0.07	0.05	0.05
L cerebellum	(-15,-54,-18)	-0.01	-0.01	0	0.04	0.04
L IPS	(-24,-66,39)	0.2	0.2	0.19	-0.12	-0.11
L SFS	(-24,24,54)	0.08	0.08	0.09	-0.08	-0.07
R cerebellum	(36,-69,-30)	0.1	0.1	0.08	0.09	0.09
L GFs	(-9,54,45)	0.09	0.09	0.06	-0.07	-0.07
L insula	(-30,27,0)	-0.01	-0.01	0.05	0.03	0.04
L GFs	(-9,36,60)	0.08	0.08	0.09	0.02	0.02
L angular	(-48,-69,30)	0.06	0.06	0.07	-0.01	-0.01
R caudate	(12,3,12)	0.02	0.02	0.01	-0.03	-0.03
R inf. occip.	(27,-96,-3)	0.09	0.09	0.06	-0.03	-0.03
L SMA	(-9,3,72)	0.04	0.04	0.05	-0.01	0
R ant. fusiform	(33,-39,-24)	-0.01	-0.01	-0.01	-0.06	-0.06
vermis	(6,-54,-42)	0.06	0.06	0.06	0.05	0.05
L IPS	(-30,-66,60)	0.11	0.11	0.12	-0.05	-0.04
R GFi pars orbit.	(42,24,-9)	0.06	0.06	0.01	-0.04	-0.05
precuneus	(-3,-63,45)	0.19	0.19	0.15	0.03	0.01
L parahippocampal	(-36,-18,-18)	0.21	0.21	0.18	0.01	0.01
brainstem	(0,-36,-33)	0.12	0.12	0.11	0.01	-0.01
L GOm	(-39,-87,0)	-0.02	-0.02	-0.03	-0.05	-0.05
L ant. thalamus	(-12,-3,9)	0	0	-0.03	0.02	0.03
post. Thalamus	(-3,-33,3)	0.08	0.08	0.06	-0.01	-0.01
g rectus	(-3,42,-24)	0.2	0.2	0.18	0.01	0
L hippocampus	(-30,-33,-6)	0.12	0.12	0.09	0.04	0.03
L ant. STS	(-57,-12,-9)	0.12	0.12	0.12	-0.03	-0.03
R GFi pars triang.	(45,21,27)	0.15	0.15	0.09	-0.1	-0.1
L hippocampus	(-15,-6,-15)	0.18	0.18	0.13	0.1	0.1
L ant. cing. s.	(-9,30,33)	-0.02	-0.02	-0.04	-0.02	-0.01
L medial frontal	(-9,63,18)	0.03	0.03	0.01	-0.07	-0.07
R cingulate sulcus	(9,21,39)	0.08	0.08	0.11	-0.04	-0.03
L ant temp pole	(-33,6,-51)	0.07	0.07	0.07	0.05	0.06
brainstem	(3,-15,-12)	0.1	0.1	0.07	-0.02	-0.01
L cerebellum	(-21,-33,-51)	0.11	0.11	0.1	0.03	0.03
R inf. occip.	(42,-78,-9)	0.07	0.06	0.05	-0.01	-0.01
L cerebellum	(-30,-54,-39)	0.08	0.08	0.09	-0.07	-0.07
L orbitofrontal	(-15,60,-12)	0.27	0.27	0.24	0.05	0.04
L temporal pole	(-54,12,-21)	0.15	0.15	0.12	0.09	0.08
L precentral gyrus	(-33,-9,45)	0.02	0.02	0	-0.06	-0.07
R GOm	(30,-93,18)	0.05	0.05	0.03	-0.03	-0.03
R cerebellum	(21,-39,-48)	0.22	0.21	0.2	0	0.01
L ant. Temporal	(-30,3,-30)	0.07	0.08	0.03	0.03	0.03
L caudate	(-15,21,12)	0.05	0.05	0.05	-0.07	-0.08
L supramarginal g.	(-60,-45,27)	0.15	0.15	0.14	0.08	0.07
L middle frontal g.	(-24,51,12)	0.05	0.06	0.07	0.12	0.16
ICC VALUES		weighted network
node	MNI coordinates	Ei	Li	bi	Eloc,i	Ci
R cerebellum	(12,-81,-36)	0.14	0.12	0.26	0.12	0.13
precuneus	(-3,-57,15)	0.23	0.22	0.14	0.19	0.2
L GFi pars triang.	(-51,21,24)	0.26	0.24	0.15	0.26	0.29
dorsomedial prefrontal	(-3,15,54)	0.23	0.21	0.15	0.2	0.23
L vOT	(-54,-57,-18)	0.39	0.36	0.25	0.3	0.32
R cerebellum	(30,-69,-54)	0.27	0.25	0.18	0.2	0.22
L ant. GFi	(-39,39,-18)	0.41	0.41	0.26	0.3	0.31
L GFI pars orbit.	(-54,27,-3)	0.14	0.13	0.1	0.08	0.1
L ant. fusiform	(-36,-42,-24)	0.21	0.2	0.18	0.16	0.18
L lingual	(-15,-93,-9)	0.11	0.09	0.03	0.07	0.09
L IFJ	(-39,6,33)	0.28	0.27	0.18	0.18	0.2
L post. GTM	(-63,-39,-6)	0.28	0.26	0.09	0.22	0.25
L GFs	(-33,6,60)	0.11	0.1	0.05	0.06	0.09
L post. STS	(-60,-54,9)	0.36	0.34	0.19	0.25	0.28
L cerebellum	(-15,-54,-18)	0.2	0.19	0.19	0.13	0.15
L IPS	(-24,-66,39)	0.43	0.4	0.2	0.31	0.34
L SFS	(-24,24,54)	0.27	0.25	0.23	0.25	0.27
R cerebellum	(36,-69,-30)	0.17	0.16	0.2	0.07	0.09
L GFs	(-9,54,45)	0.33	0.32	0.1	0.29	0.32
L insula	(-30,27,0)	0.18	0.17	0.2	0.14	0.16
L GFs	(-9,36,60)	0.21	0.2	0.19	0.21	0.22
L angular	(-48,-69,30)	0.26	0.23	0.2	0.17	0.2
R caudate	(12,3,12)	0.03	0.01	0.25	0	0.02
R inf. occip.	(27,-96,-3)	0.24	0.22	0.17	0.19	0.2
L SMA	(-9,3,72)	0.26	0.27	0.09	0.22	0.24
R ant. fusiform	(33,-39,-24)	0.09	0.08	0.16	0.03	0.05
vermis	(6,-54,-42)	0.19	0.19	0.2	0.2	0.21
L IPS	(-30,-66,60)	0.29	0.27	0.18	0.21	0.23
R GFi pars orbit.	(42,24,-9)	0.17	0.16	0.17	0.14	0.15
precuneus	(-3,-63,45)	0.33	0.33	0.19	0.3	0.32
L parahippocampal	(-36,-18,-18)	0.44	0.44	0.22	0.32	0.33
brainstem	(0,-36,-33)	0.2	0.2	0.26	0.17	0.18
L GOm	(-39,-87,0)	0.21	0.21	0.06	0.16	0.19
L ant. thalamus	(-12,-3,9)	0.22	0.21	0.1	0.26	0.28
post. Thalamus	(-3,-33,3)	0.21	0.18	0.19	0.14	0.17
g rectus	(-3,42,-24)	0.26	0.23	0.24	0.16	0.17
L hippocampus	(-30,-33,-6)	0.33	0.31	0.25	0.21	0.22
L ant. STS	(-57,-12,-9)	0.28	0.27	0.1	0.15	0.18
R GFi pars triang.	(45,21,27)	0.29	0.28	0.15	0.22	0.24
L hippocampus	(-15,-6,-15)	0.32	0.31	0.14	0.18	0.2
L ant. cing. s.	(-9,30,33)	0.13	0.13	0.12	0.05	0.06
L medial frontal	(-9,63,18)	0.25	0.23	0.07	0.17	0.2
R cingulate sulcus	(9,21,39)	0.29	0.27	0.12	0.18	0.21
L ant temp pole	(-33,6,-51)	0.22	0.23	0.15	0.17	0.18
brainstem	(3,-15,-12)	0.15	0.13	0.19	0.08	0.08
L cerebellum	(-21,-33,-51)	0.23	0.21	0.18	0.14	0.17
R inf. occip.	(42,-78,-9)	0.09	0.1	0.3	0.1	0.11
L cerebellum	(-30,-54,-39)	0.22	0.21	0.06	0.21	0.23
L orbitofrontal	(-15,60,-12)	0.45	0.44	0.19	0.36	0.38
L temporal pole	(-54,12,-21)	0.29	0.28	0.13	0.22	0.24
L precentral gyrus	(-33,-9,45)	0.2	0.19	0.06	0.09	0.12
R GOm	(30,-93,18)	0.3	0.27	0.32	0.24	0.27
R cerebellum	(21,-39,-48)	0.21	0.2	0.22	0.13	0.13
L ant. Temporal	(-30,3,-30)	0.26	0.26	0.04	0.17	0.2
L caudate	(-15,21,12)	0.2	0.18	0.16	0.15	0.17
L supramarginal g.	(-60,-45,27)	0.32	0.3	0.18	0.18	0.2
L middle frontal g.	(-24,51,12)	0.25	0.25	0.16	0.1	0.13
